# Supplementary material
Source: Springer Nature journal article supplement (https://www.springermedizin.de/resource/supplementary/13030_2013_136_MOESM1_ESM.pdf/9644818)

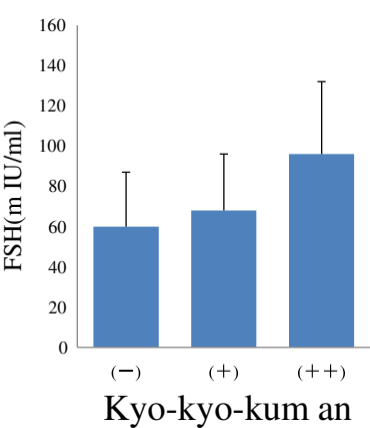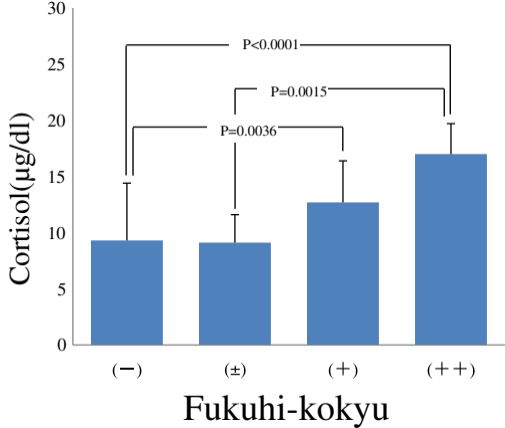

Supplement: MOESM1 [file 9644818]
